# Supplementary material for: Effects of Specific Electric Field Stimulation on the Release and Activity of Secreted Acid Phosphatases from Leishmania tarentolae and Implications for Therapy
Source: PubMed Central journal article supplement (PMC6313409; doi:10.3390/pathogens7040077), 2018-09-27
Supplement: pathogens-07-00077-s001.pdf [file pathogens-07-00077-s001.pdf]

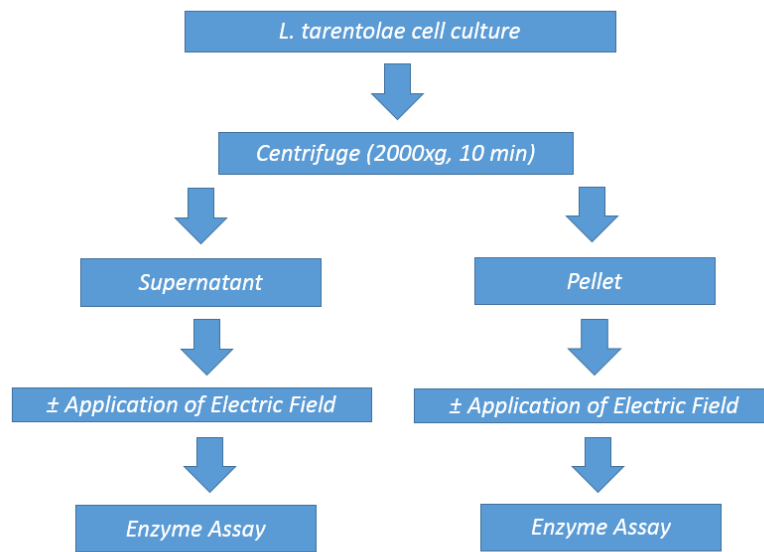

**Supplemental Figure S1.** Flow diagram of method 1. Thus, method 1 allows testing of direct effects of electric field on the previously secreted enzyme.

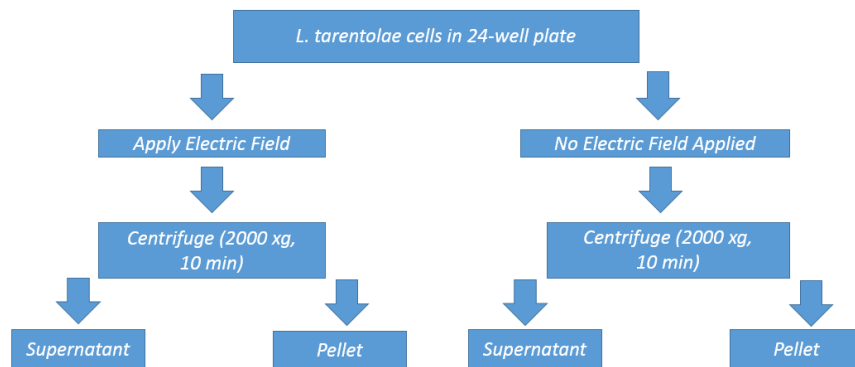

**Supplemental Figure S2.** Flow diagram of method 2 with enzyme assays performed on the subsequent supernatant and pellet fractions. Thus, method 2 allows assessment of the effect of electric field on secretion of acid phosphatase from cells.

**Table S1.** Effects of Electrical Stimulation, at 50 Hz Applied After Fractionation, on SAP Activity.

| <b>50 Hz Cathodic Monophasic</b> |                                       |                |                                  |                |
|----------------------------------|---------------------------------------|----------------|----------------------------------|----------------|
| <b>Current (μA)</b>              | <b>Supernatant Percent Difference</b> |                | <b>Pellet Percent Difference</b> |                |
|                                  | <b>Mean ± SD</b>                      | <b>P-Value</b> | <b>Mean ± standard Deviation</b> | <b>P-Value</b> |
| 100                              | 5.22 ± 0.12                           | < 0.0001       | -2.88 ± 0.34                     | < 0.0001       |
| 150                              | 0.34 ± 0.11                           | 0.0158         | 1.51 ± 0.16                      | 0.0013         |
| 200                              | 1.77 ± 0.11                           | < 0.0001       | 0.84 ± 0.28                      | 0.0213         |
| 250                              | 1.31 ± 0.29                           | 0.0031         | -1.76 ± 0.58                     | 0.0062         |
| 300                              | -1.763 ± 0.006                        | 0.0558         | -1.13 ± 0.15                     | 0.0029         |
| 400                              | -0.86 ± 0.11                          | 0.0006         | 2.17 ± 0.83                      | 0.0147         |
| 500                              | 3.09 ± 0.28                           | < 0.0001       | 0.51 ± 0.44                      | 0.2879         |
| <b>50 Hz Symmetric Biphasic</b>  |                                       |                |                                  |                |
| <b>Current (μA)</b>              | <b>Supernatant Percent Difference</b> |                | <b>Pellet Percent Difference</b> |                |
|                                  | <b>Mean ± standard Deviation</b>      | <b>P-Value</b> | <b>Mean ± standard Deviation</b> | <b>P-Value</b> |
| 100                              | -6.62 ± 0.24                          | 0.4976         | 6.75 ± 0.22                      | 0.0249         |
| 150                              | 4.01 ± 0.39                           | 0.0029         | 2.19 ± 0.61                      | 0.0006         |
| 200                              | -1.60 ± 0.18                          | < 0.0001       | -6.83 ± 0.92                     | 0.0002         |
| 250                              | -0.241 ± 0.000                        | 0.0011         | -2.77 ± 0.60                     | < 0.0001       |
| 300                              | 1.00 ± 0.34                           | 0.0249         | -1.41 ± 0.50                     | 0.2051         |
| 400                              | 0.979 ± 0.069                         | 0.0039         | -1.02 ± 0.34                     | < 0.0001       |
| 500                              | -1.34 ± 0.17                          | 0.0061         | 0.47 ± 0.98                      | 0.0721         |
| <b>50 Hz Anodic Monophasic</b>   |                                       |                |                                  |                |
| <b>Current (μA)</b>              | <b>Supernatant Percent Difference</b> |                | <b>Pellet Percent Difference</b> |                |
|                                  | <b>Mean ± standard Deviation</b>      | <b>P-Value</b> | <b>Mean ± standard Deviation</b> | <b>P-Value</b> |
| 100                              | -0.28 ± 0.59                          | 0.0013         | -1.15 ± 0.28                     | 0.0019         |
| 150                              | 0.52 ± 0.14                           | 0.0001         | 1.68 ± 0.29                      | 0.0377         |
| 200                              | -0.635 ± 0.068                        | 0.0001         | 6.46 ± 0.80                      | 0.7418         |
| 250                              | -0.67 ± 0.14                          | < 0.001        | -5.496 ± 0.015                   | 0.0151         |
| 300                              | -0.27 ± 0.13                          | 0.0003         | -1.33 ± 1.44                     | < 0.0001       |
| 400                              | -0.735 ± 0.066                        | < 0.0001       | 7.09 ± 0.31                      | 0.0198         |
| 500                              | -0.54 ± 0.18                          | 0.0003         | 3.12 ± 2.24                      | 0.0009         |

Shown are the average percent difference from control ± SD for monophasic cathodic, symmetric biphasic, and monophasic anodic, at a frequency of 50 Hz, where fractionation occurred before electrical stimulation (Method 1). Statistical significance relative to control cells was determined by two-tailed Student's T-Tests. n = 3; α = 0.05. Negative mean values indicate values lower than control (no electrical stimulation) cell values.

**Table S2.** Effects of Electrical Stimulation, at 10,000 Hz Applied After Fractionation, on SAP Activity.

| <b>10,000 Hz Cathodic Monophasic</b> |                                                 |                |                                                 |                |
|--------------------------------------|-------------------------------------------------|----------------|-------------------------------------------------|----------------|
| <b>Current (<math>\mu</math>A)</b>   | <b>Supernatant Percent Difference</b>           |                | <b>Pellet Percent Difference</b>                |                |
|                                      | <b>Mean <math>\pm</math> standard Deviation</b> | <b>P-Value</b> | <b>Mean <math>\pm</math> standard Deviation</b> | <b>P-Value</b> |
| 100                                  | 2.38 $\pm$ 0.15                                 | 0.0013         | -2.90 $\pm$ 0.22                                | 0.0019         |
| 150                                  | 10.18 $\pm$ 0.18                                | < 0.0001       | -0.12 $\pm$ 0.58                                | 0.0377         |
| 200                                  | 16.47 $\pm$ 0.18                                | < 0.0001       | -3.431 $\pm$ 0.008                              | 0.7418         |
| 250                                  | 6.77 $\pm$ 0.21                                 | < 0.0001       | -10.83 $\pm$ 0.61                               | 0.0151         |
| 300                                  | 15.433 $\pm$ 0.084                              | 0.0003         | -4.506 $\pm$ 0.010                              | < 0.0001       |
| 400                                  | 22.62 $\pm$ 0.22                                | < 0.0001       | -4.51 $\pm$ 0.43                                | 0.0198         |
| 500                                  | 307.56 $\pm$ 0.18                               | 0.0003         | -64.43 $\pm$ 2.15                               | 0.0009         |
| <b>10,000 Hz Symmetric Biphasic</b>  |                                                 |                |                                                 |                |
| <b>Current (<math>\mu</math>A)</b>   | <b>Supernatant Percent Difference</b>           |                | <b>Pellet Percent Difference</b>                |                |
|                                      | <b>Mean <math>\pm</math> standard Deviation</b> | <b>P-Value</b> | <b>Mean <math>\pm</math> standard Deviation</b> | <b>P-Value</b> |
| 100                                  | 3.84 $\pm$ 0.16                                 | 0.0006         | -9.17 $\pm$ 0.54                                | 0.0014         |
| 150                                  | 3.18 $\pm$ 0.28                                 | 0.0003         | 7.30 $\pm$ 0.60                                 | 0.0340         |
| 200                                  | 4.42 $\pm$ 0.28                                 | 0.0025         | -6.99 $\pm$ 0.23                                | 0.0022         |
| 250                                  | 1.707 $\pm$ 0.083                               | 0.0003         | -4.97 $\pm$ 0.29                                | 0.0109         |
| 300                                  | 1.495 $\pm$ 0.002                               | 0.0013         | -8.62 $\pm$ 0.30                                | 0.0005         |
| 400                                  | -0.354 $\pm$ 0.077                              | 0.0010         | -5.723 $\pm$ 0.021                              | 0.0003         |
| 500                                  | 1.20 $\pm$ 0.13                                 | 0.0007         | -11.91 $\pm$ 0.23                               | 0.0011         |
| <b>10,000 Hz Anodic Monophasic</b>   |                                                 |                |                                                 |                |
| <b>Current (<math>\mu</math>A)</b>   | <b>Supernatant Percent Difference</b>           |                | <b>Pellet Percent Difference</b>                |                |
|                                      | <b>Mean <math>\pm</math> standard Deviation</b> | <b>P-Value</b> | <b>Mean <math>\pm</math> standard Deviation</b> | <b>P-Value</b> |
| 100                                  | 10.42 $\pm$ 0.21                                | < 0.0001       | -1.59 $\pm$ 0.16                                | 0.0021         |
| 150                                  | 11.52 $\pm$ 0.11                                | < 0.0001       | -9.65 $\pm$ 1.17                                | 0.0003         |
| 200                                  | 11.10 $\pm$ 0.26                                | < 0.0001       | -4.79 $\pm$ 0.37                                | 0.0061         |
| 250                                  | 16.009 $\pm$ 0.066                              | < 0.0001       | 15.99 $\pm$ 0.32                                | 0.1994         |
| 300                                  | 16.90 $\pm$ 0.41                                | < 0.0001       | -2.50 $\pm$ 0.14                                | 0.0022         |
| 400                                  | 16.209 $\pm$ 0.031                              | < 0.0001       | -1.88 $\pm$ 0.98                                | 0.0002         |
| 500                                  | 17.697 $\pm$ 0.098                              | < 0.0001       | 4.90 $\pm$ 0.90                                 | < 0.0001       |

Shown are the average percent difference from control  $\pm$  SD for monophasic cathodic, symmetric biphasic, and monophasic anodic, at a frequency of 10,000 Hz, where fractionation occurred before electrical stimulation (Method 1). Statistical significance relative to control cells was determined by two-tailed Student's T-Tests. n = 3;  $\alpha$  = 0.05. Negative mean values indicate values lower than control (no electrical stimulation) cell values.

**Table S3.** Effects of Electrical Stimulation, at 50 Hz Applied Before Fractionation, on SAP Activity and Secretion.

| <b>50 Hz Cathodic Monophasic</b>   |                                                 |                |                                                 |                |
|------------------------------------|-------------------------------------------------|----------------|-------------------------------------------------|----------------|
| <b>Current (<math>\mu</math>A)</b> | <b>Supernatant Percent Difference</b>           |                | <b>Pellet Percent Difference</b>                |                |
|                                    | <b>Mean <math>\pm</math> standard Deviation</b> | <b>P-Value</b> | <b>Mean <math>\pm</math> standard Deviation</b> | <b>P-Value</b> |
| 100                                | 5.59 $\pm$ 0.30                                 | 0.0004         | -1.531 $\pm$ 0.096                              | 0.0065         |
| 150                                | 2.17 $\pm$ 0.26                                 | < 0.0001       | 0.15 $\pm$ 0.26                                 | 0.3739         |
| 200                                | -0.87 $\pm$ 0.71                                | 0.0894         | -5.21 $\pm$ 0.46                                | 0.0002         |
| 250                                | 0.34 $\pm$ 0.34                                 | 0.1012         | 1.29 $\pm$ 0.32                                 | 0.0080         |
| 300                                | -2.25 $\pm$ 0.33                                | 0.0006         | 2.87 $\pm$ 0.57                                 | 0.0018         |
| 400                                | 1.347 $\pm$ 0.095                               | 0.0075         | 6.51 $\pm$ 0.24                                 | < 0.0001       |
| 500                                | -1.11 $\pm$ 0.16                                | 0.0003         | 1.21 $\pm$ 0.16                                 | 0.0139         |
| <b>50 Hz Symmetric Biphasic</b>    |                                                 |                |                                                 |                |
| <b>Current (<math>\mu</math>A)</b> | <b>Supernatant Percent Difference</b>           |                | <b>Pellet Percent Difference</b>                |                |
|                                    | <b>Mean <math>\pm</math> standard Deviation</b> | <b>P-Value</b> | <b>Mean <math>\pm</math> standard Deviation</b> | <b>P-Value</b> |
| 100                                | -3.26 $\pm$ 1.99                                | 0.1330         | -36.20 $\pm$ 0.70                               | < 0.0001       |
| 150                                | 1.30 $\pm$ 1.11                                 | 0.0862         | 2.20 $\pm$ 0.61                                 | 0.1708         |
| 200                                | 0.48 $\pm$ 0.73                                 | 0.5593         | -8.38 $\pm$ 3.50                                | 0.0669         |
| 250                                | -0.57 $\pm$ 0.75                                | 0.4121         | -2.59 $\pm$ 1.42                                | 0.1700         |
| 300                                | 1.10 $\pm$ 0.69                                 | 0.2035         | 2.48 $\pm$ 3.60                                 | 0.3545         |
| 400                                | 0.05 $\pm$ 0.66                                 | 0.984          | 2.51 $\pm$ 1.67                                 | 0.1145         |
| 500                                | 0.57 $\pm$ 0.79                                 | 0.7004         | -2.46 $\pm$ 0.78                                | 0.0335         |
| <b>50 Hz Anodic Monophasic</b>     |                                                 |                |                                                 |                |
| <b>Current (<math>\mu</math>A)</b> | <b>Supernatant Percent Difference</b>           |                | <b>Pellet Percent Difference</b>                |                |
|                                    | <b>Mean <math>\pm</math> standard Deviation</b> | <b>P-Value</b> | <b>Mean <math>\pm</math> standard Deviation</b> | <b>P-Value</b> |
| 100                                | 0.13 $\pm$ 3.17                                 | 0.9353         | -4.255 $\pm$ 0.000                              | < 0.0001       |
| 150                                | 0.003 $\pm$ 0.976                               | 1.0000         | -2.151 $\pm$ 0.005                              | 0.0003         |
| 200                                | 0.38 $\pm$ 0.55                                 | 0.3739         | 0.49 $\pm$ 0.12                                 | 0.0572         |
| 250                                | 1.29 $\pm$ 0.56                                 | 0.0474         | 0.21 $\pm$ 0.41                                 | 0.6240         |
| 300                                | 0.00 $\pm$ 0.00                                 | 1.0000         | 2.34 $\pm$ 0.13                                 | 0.0015         |
| 400                                | 4.05 $\pm$ 2.35                                 | 0.0406         | 1.64 $\pm$ 0.21                                 | 0.0023         |
| 500                                | -1.68 $\pm$ 4.52                                | 0.4981         | 1.74 $\pm$ 0.24                                 | 0.0002         |

Shown are the average percent difference from control  $\pm$  SD for monophasic cathodic, symmetric biphasic, and monophasic anodic, at a frequency of 50 Hz, where electrical stimulation occurred before fractionation (Method 2). Statistical significance relative to control cells was determined by two-tailed Student's T-Tests. n = 3;  $\alpha$  = 0.05. Negative mean values indicate values lower than control (no electrical stimulation) cell values.

**Table S4.** Effects of Electrical Stimulation, at 10,000 Hz Applied Before Fractionation, on SAP Activity and Secretion

| <b>10,000 Hz Cathodic Monophasic</b> |                                       |                |                                  |                |
|--------------------------------------|---------------------------------------|----------------|----------------------------------|----------------|
| <b>Current (μA)</b>                  | <b>Supernatant Percent Difference</b> |                | <b>Pellet Percent Difference</b> |                |
|                                      | <b>Mean ± standard Deviation</b>      | <b>P-Value</b> | <b>Mean ± standard Deviation</b> | <b>P-Value</b> |
| 100                                  | -0.76 ± 0.40                          | 0.0916         | -2.43 ± 0.40                     | 0.0002         |
| 150                                  | -0.86 ± 0.38                          | 0.0434         | 2.79 ± 0.40                      | 0.0003         |
| 200                                  | 0.60 ± 0.30                           | 0.1583         | -5.01 ± 0.21                     | < 0.0001       |
| 250                                  | -0.54 ± 0.31                          | 0.0295         | -1.873 ± 0.000                   | < 0.0001       |
| 300                                  | 1.81 ± 0.17                           | 0.0002         | -1.93 ± 0.54                     | 0.0129         |
| 400                                  | 1.42 ± 0.17                           | < 0.0001       | 11.83 ± 0.25                     | < 0.0001       |
| 500                                  | 1.23 ± 0.58                           | 0.0291         | -2.88 ± 0.46                     | 0.0022         |
| <b>10,000 Hz Symmetric Biphasic</b>  |                                       |                |                                  |                |
| <b>Current (μA)</b>                  | <b>Supernatant Percent Difference</b> |                | <b>Pellet Percent Difference</b> |                |
|                                      | <b>Mean ± standard Deviation</b>      | <b>P-Value</b> | <b>Mean ± standard Deviation</b> | <b>P-Value</b> |
| 100                                  | -1.06 ± 0.74                          | 0.5299         | 54.47 ± 1.26                     | 0.1240         |
| 150                                  | 0.64 ± 0.31                           | 0.0314         | 2.01 ± 1.39                      | 0.1000         |
| 200                                  | 0.00 ± 0.15                           | 1.0000         | 13.096 ± 0.078                   | < 0.0001       |
| 250                                  | -0.74 ± 0.51                          | 0.0816         | 1.17 ± 0.59                      | 0.0550         |
| 300                                  | 0.74 ± 0.26                           | 0.0179         | 4.40 ± 0.34                      | < 0.0001       |
| 400                                  | -0.19 ± 0.73                          | 0.6433         | -0.35 ± 0.80                     | 0.5614         |
| 500                                  | -1.26 ± 0.28                          | 0.0032         | -12.21 ± 0.89                    | 0.0000         |
| <b>10,000 Hz Anodic Monophasic</b>   |                                       |                |                                  |                |
| <b>Current (μA)</b>                  | <b>Supernatant Percent Difference</b> |                | <b>Pellet Percent Difference</b> |                |
|                                      | <b>Mean ± standard Deviation</b>      | <b>P-Value</b> | <b>Mean ± standard Deviation</b> | <b>P-Value</b> |
| 100                                  | -0.86 ± 1.48                          | 0.2030         | 3.49 ± 4.22                      | 0.2227         |
| 150                                  | 0.248 ± 0.086                         | 0.2520         | 4.48 ± 0.52                      | 0.0001         |
| 200                                  | -5.525 ± 0.075                        | < 0.0001       | 3.89 ± 0.30                      | < 0.0001       |
| 250                                  | 1.47 ± 0.14                           | 0.0020         | 13.79 ± 2.88                     | 0.0008         |
| 300                                  | -0.43 ± 0.14                          | 0.0030         | -4.47 ± 0.55                     | 0.0002         |
| 400                                  | 1.55 ± 0.51                           | 0.0040         | -2.32 ± 0.46                     | 0.0036         |
| 500                                  | 1.70 ± 0.86                           | 0.0640         | 1.843 ± 0.008                    | 0.0080         |

Shown are the average percent difference from control ± SD for monophasic cathodic, symmetric biphasic, and monophasic anodic, at a frequency of 10,000 Hz, where electrical stimulation occurred before fractionation (Method 2). Statistical significance relative to control cells was determined by two-tailed Student's T-Tests. n = 3; α = 0.05. Negative mean values indicate values lower than control (no electrical stimulation) cell values.
